# Supplementary material for: Liposome surface functionalization based on different anchoring lipids via Staudinger ligation
Source: Royal Society of Chemistry journal article supplement (doi:10.1039/c3ob41721b), 2013-12-10

# Liposome Surface Functionalization Based on Different Anchoring Lipids via Staudinger Ligation

Pratima Vabbilisetty and Xue-Long Sun\*

## Supporting Information

<sup>1</sup>H NMR spectrum of Cholesterol-PEG<sub>2000</sub> – TP conjugate (in CDCl<sub>3</sub>)

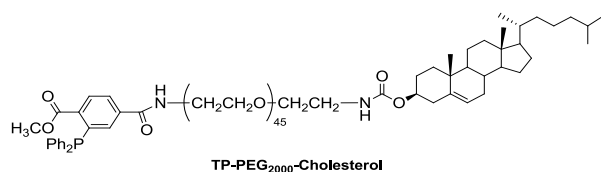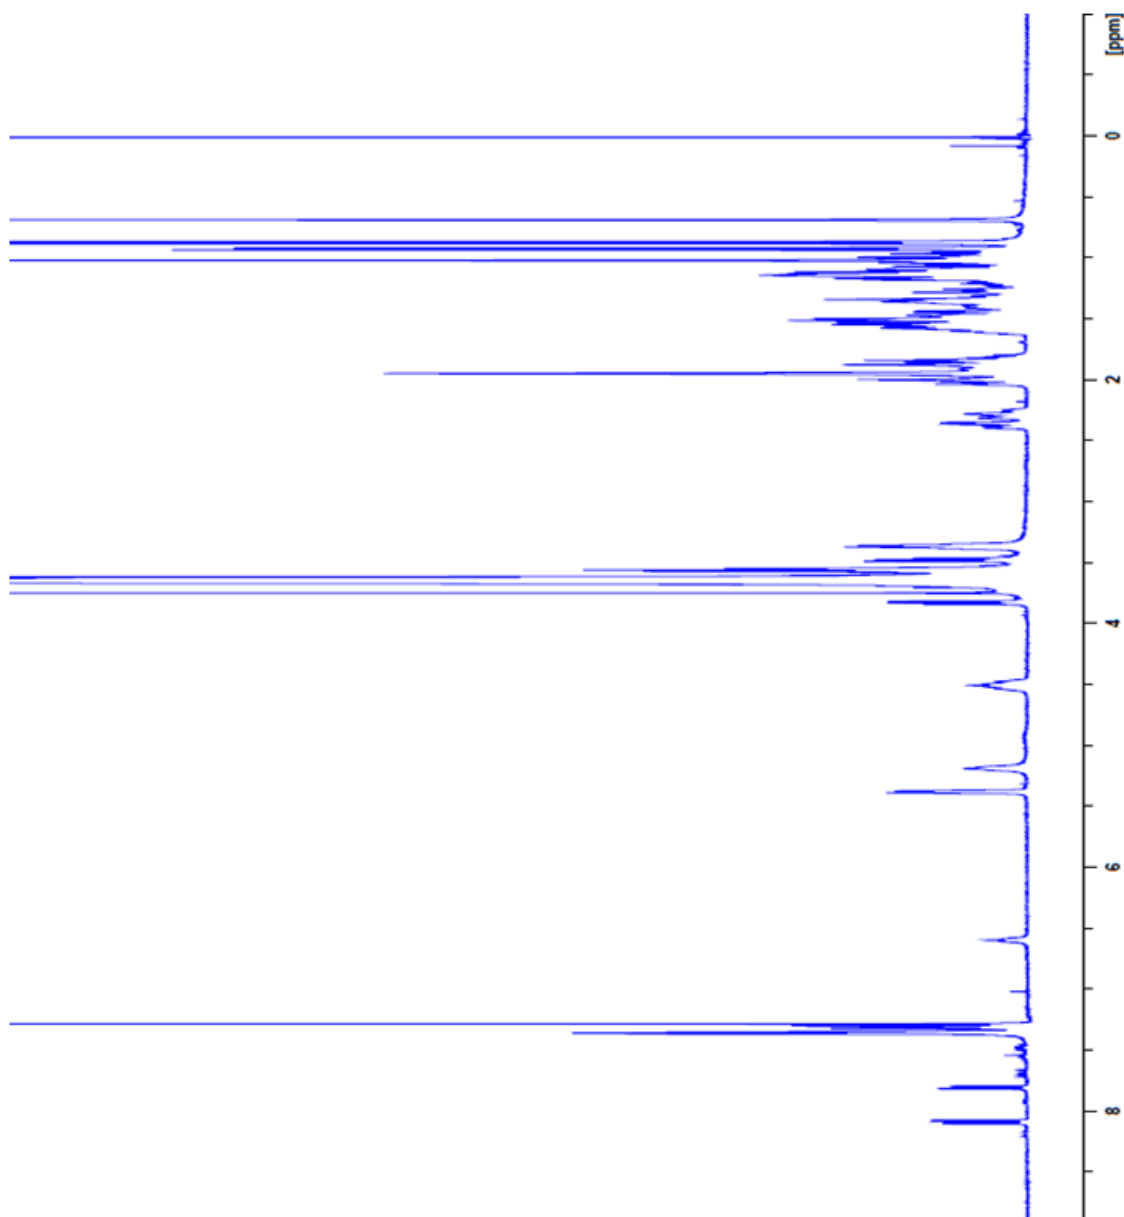

**$^{13}\text{C}$  NMR spectrum of Cholesterol-PEG<sub>2000</sub> – TP conjugate (in CDCl<sub>3</sub>)**

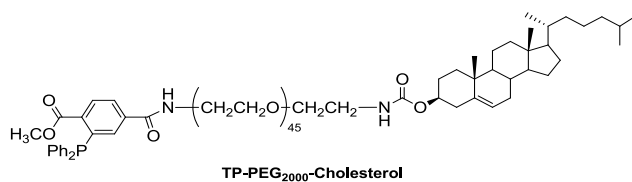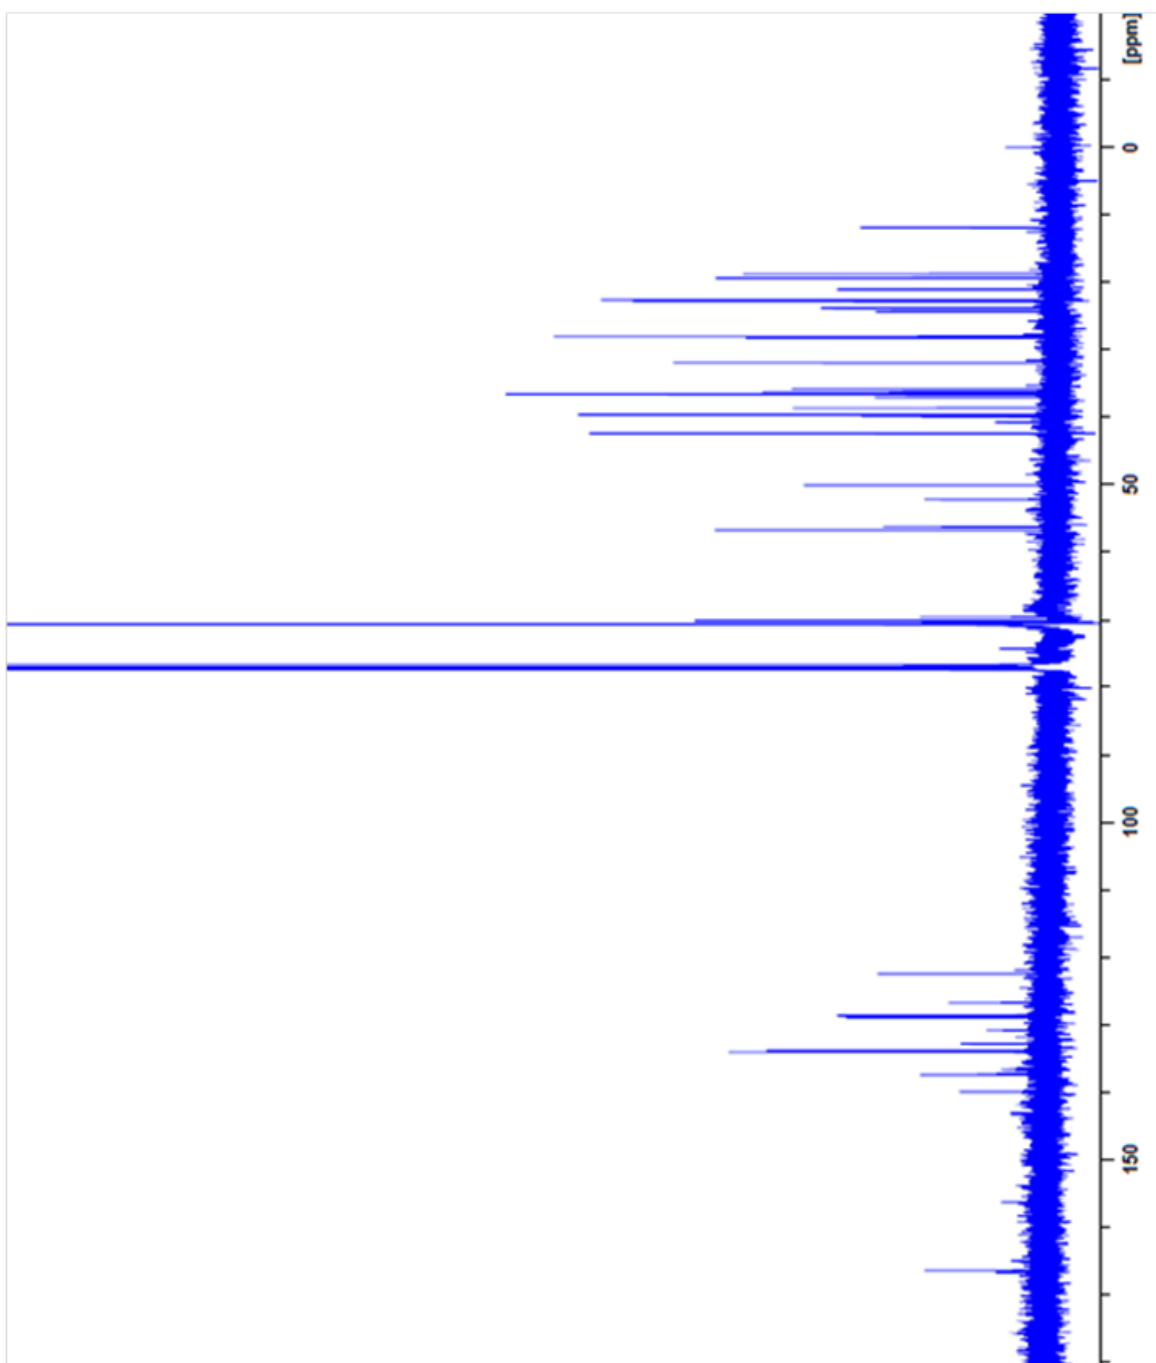

<sup>31</sup>P NMR spectrum of Cholesterol-PEG<sub>2000</sub> – TP conjugate (in CDCl<sub>3</sub>)

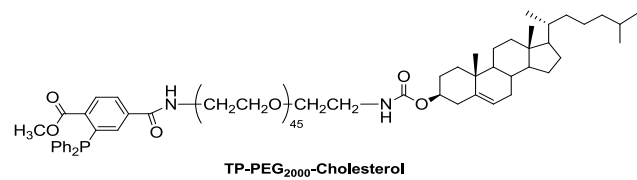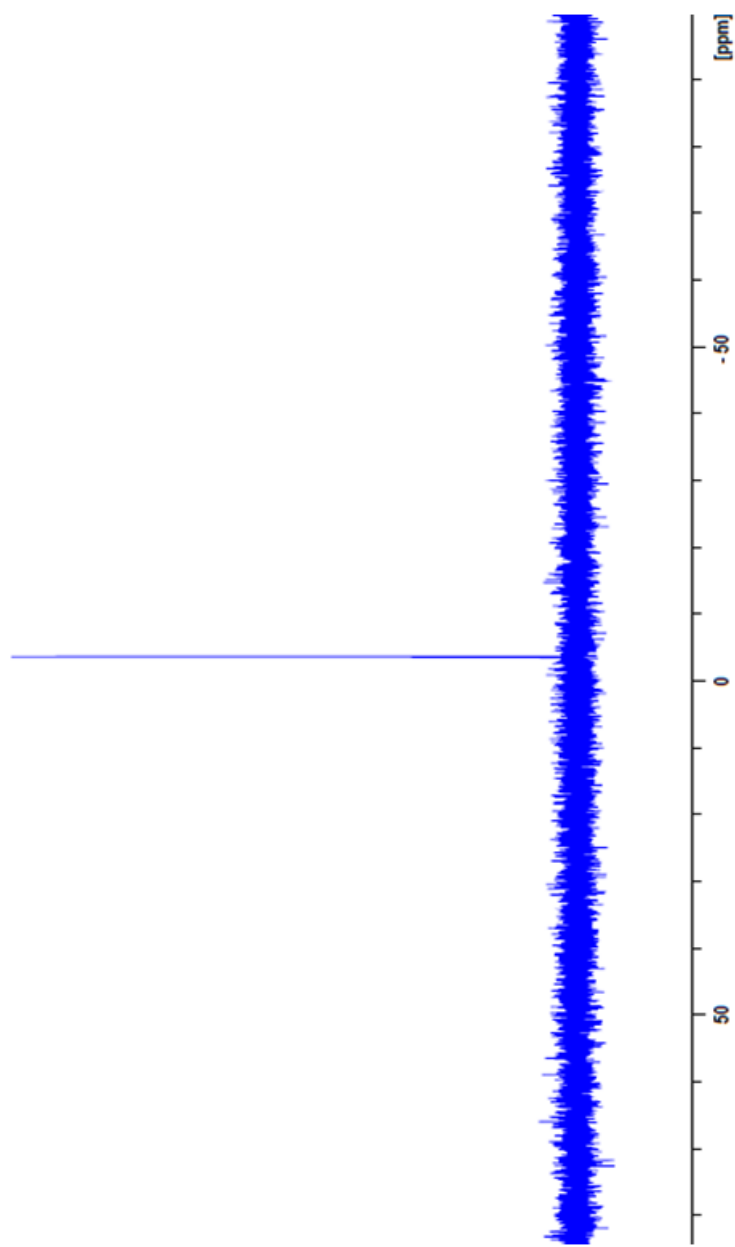

<sup>1</sup>H NMR spectrum of DSPE-PEG<sub>2000</sub> – TP conjugate (in CDCl<sub>3</sub>)

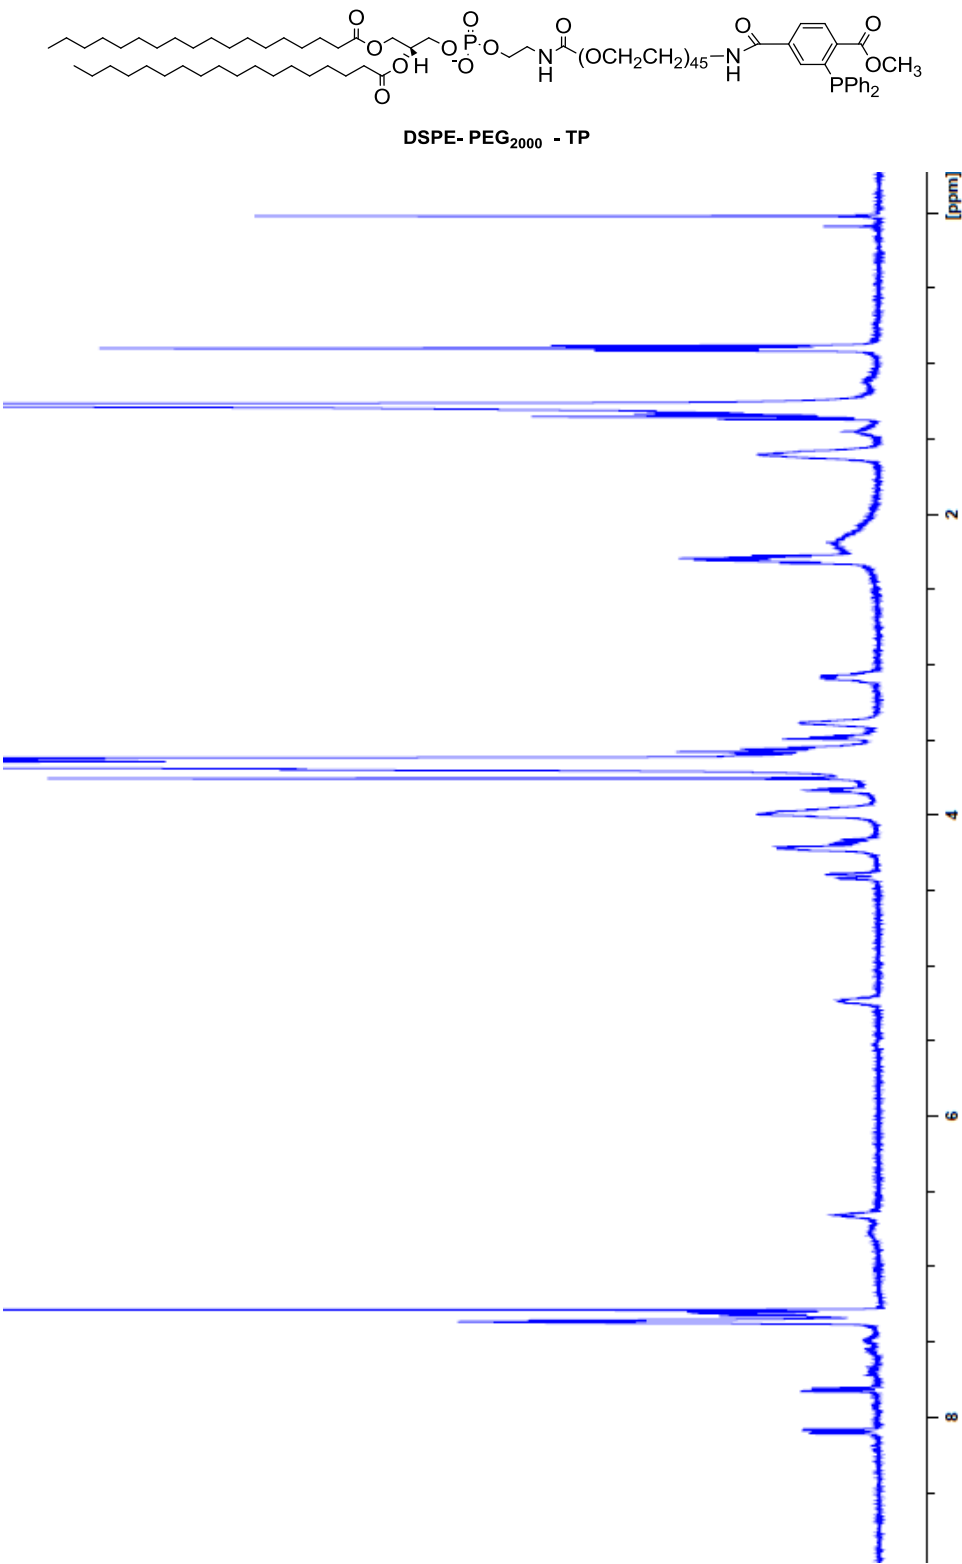

<sup>13</sup>C NMR spectrum of DSPE-PEG<sub>2000</sub> – TP conjugate (in CDCl<sub>3</sub>)

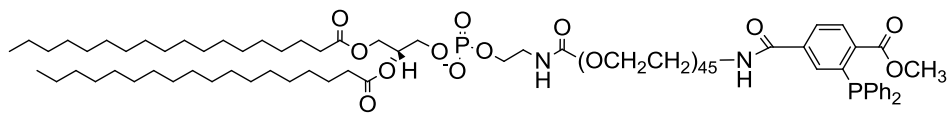

DSPE- PEG<sub>2000</sub> - TP

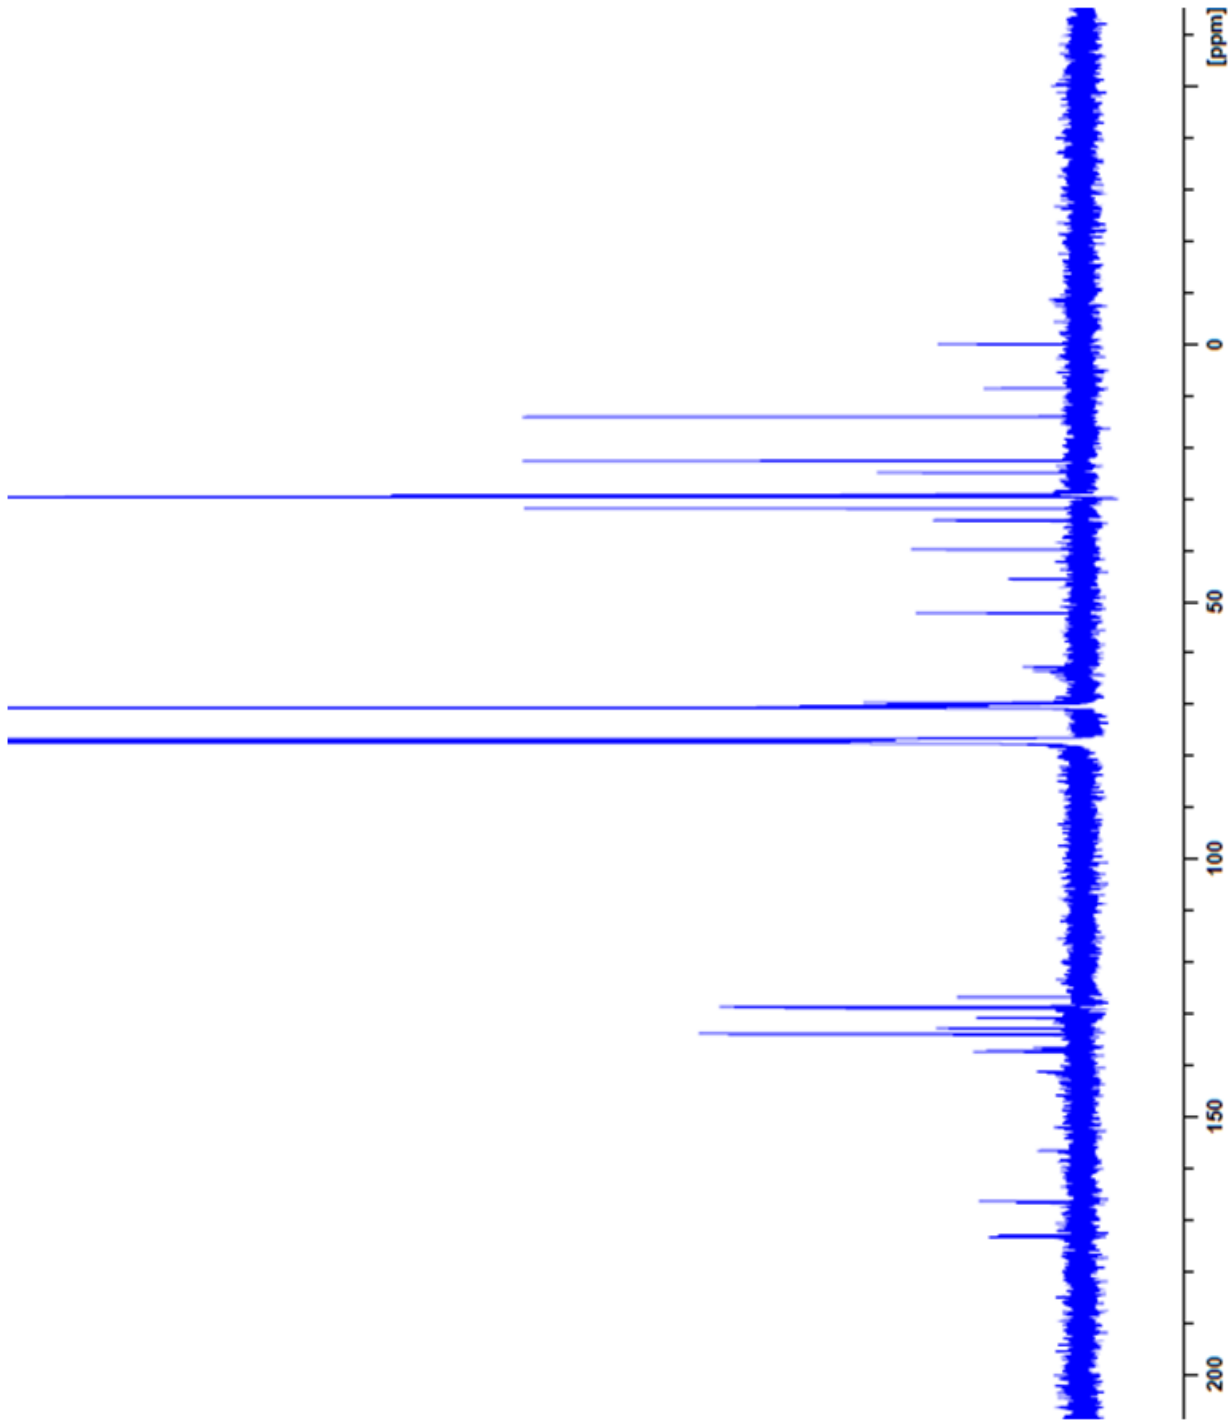

$^{31}\text{P}$  NMR spectrum of DSPE-PEG<sub>2000</sub> – TP conjugate (in CDCl<sub>3</sub>)

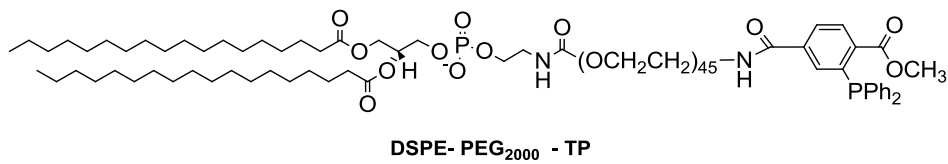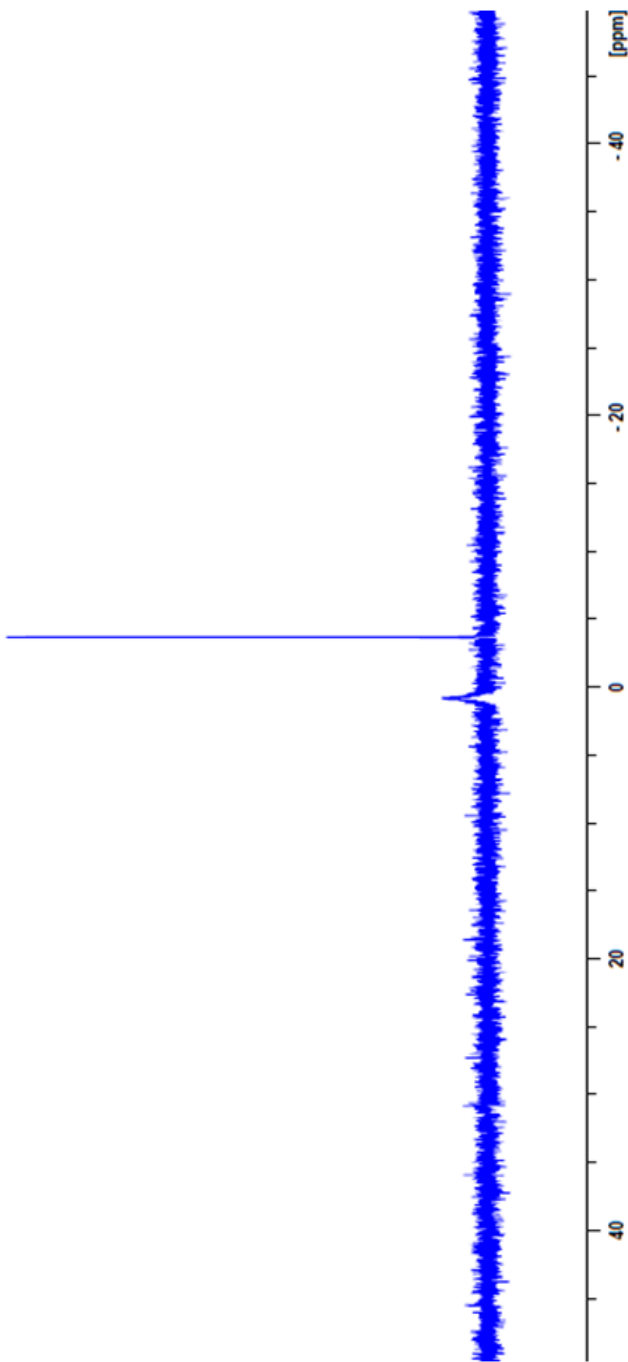

**Measurement of critical micelle concentration (CMC) of anchor lipids before and after glyco-functionalization: Cholesterol – PEG<sub>2000</sub> – TP (A) and DSPE-PEG<sub>2000</sub>-TP (B).**

**A1: Cholesterol-PEG<sub>2000</sub>-TP**

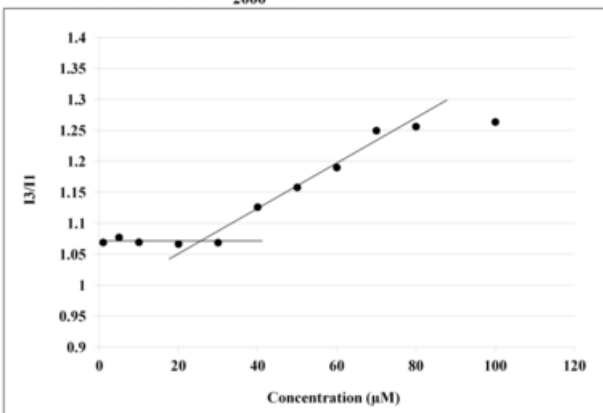

**B1: DSPE-PEG<sub>2000</sub>-TP**

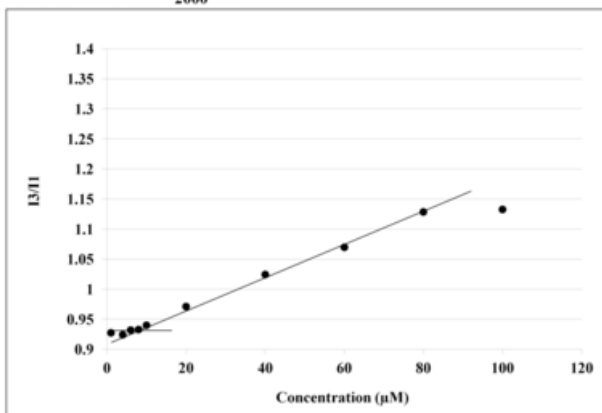

**A2: Cholesterol-PEG<sub>2000</sub>-TP + Lactose**

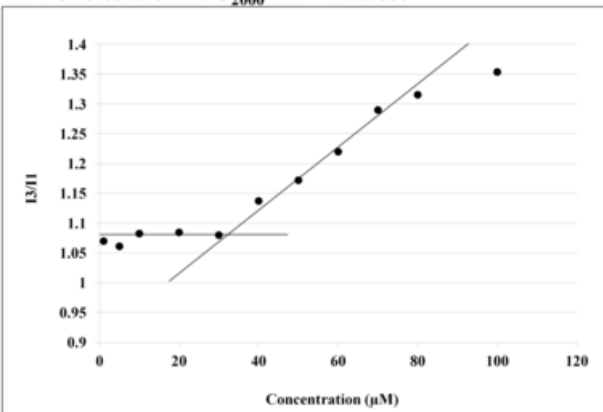

**B2: DSPE-PEG<sub>2000</sub>-TP + Lactose**

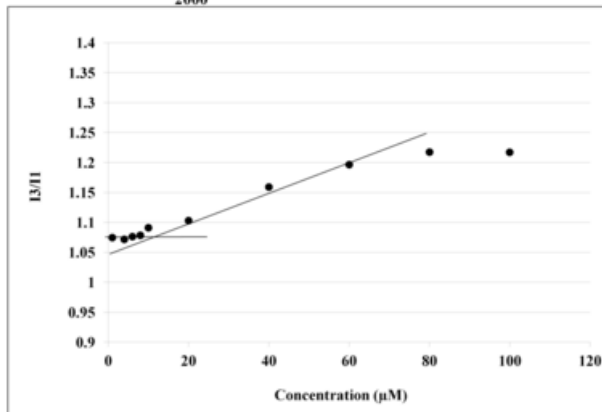

**Determination of concentration of lactose on the liposome surface**

Lactose assay calibration curve:

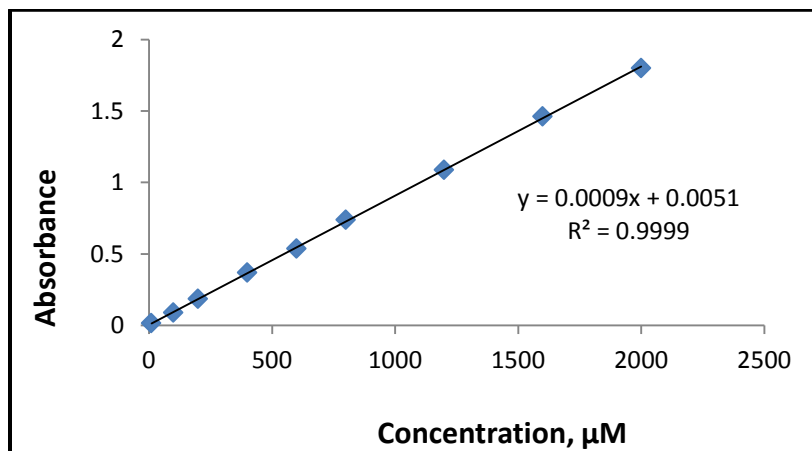

**5, 6-Carboxyfluorescein dye leakage assay:**

5, 6-CF calibration curve:

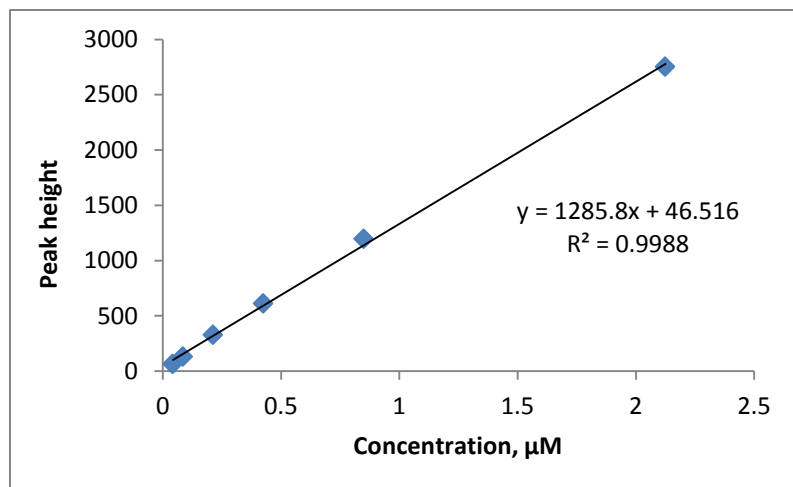

Supplement: c3ob41721b.pdf [file c3ob41721b.pdf]
